# Supplementary material for: Fluorinated poly(aryl ether)/polypropylene composite patch for prevention of abdominal adhesions after hernia repairs
Source: Royal Society of Chemistry journal article supplement (doi:10.1039/d4bm01704h), 2025-01-01
Supplement: d4bm01704h1.pdf [file d4bm01704h1.pdf]

Electronic Supplementary Material (ESI) for Biomaterials Science.  
This journal is © The Royal Society of Chemistry 2024

## Supporting Information

### **Fluorinated poly(aryl ether)/ Polypropylene Composite Patch for Prevention of Abdominal Adhesions After Hernia Repairs**

Wenqing Zhang,<sup>a,b</sup> Huawei Yang,<sup>b</sup> Xu Zhang,<sup>b</sup> Zhaoyang Wang<sup>\*b</sup>, Shifang Luan,<sup>a,b</sup>

<sup>a</sup> *School of Applied Chemistry and Engineering, University of Science and Technology of China, Hefei 230026, P. R. China.*

<sup>b</sup> *State Key Laboratory of Polymer Physics and Chemistry, Changchun Institute of Applied Chemistry, Chinese Academy of Sciences, Changchun 130022, P. R. China*

\* Corresponding author.

E-mail address: wzhaoyang2012@ciac.ac.cn, sfluan@ciac.ac.cn

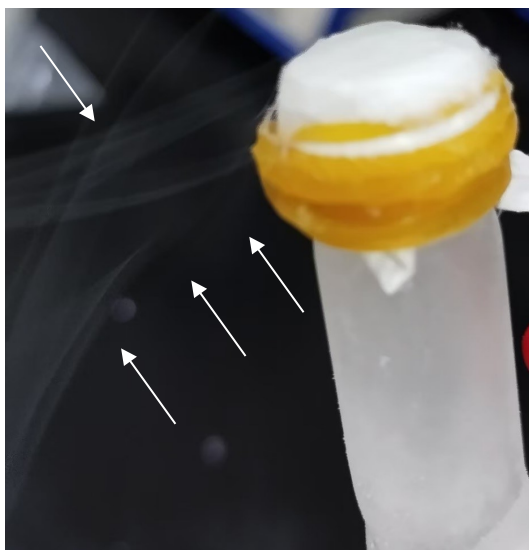

**Figure S1.** Gaseous transfer: one glass bottle containing liquid nitrogen covered with eFAPE.

**Abdominal  
disinfection**

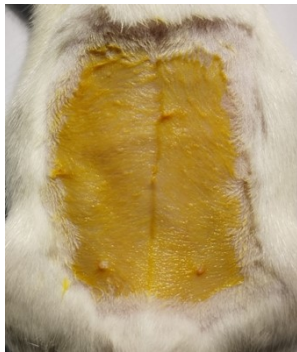

**Abdominal  
exposure**

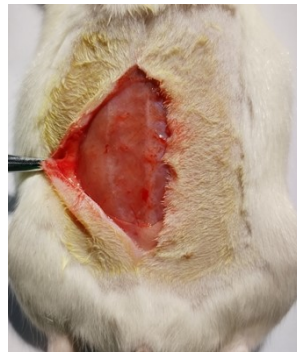

**Artificial  
hernia**

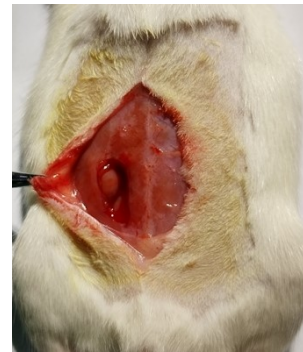

**Mesh  
implant**

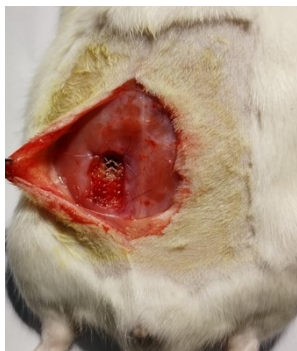

**Mesh  
suture**

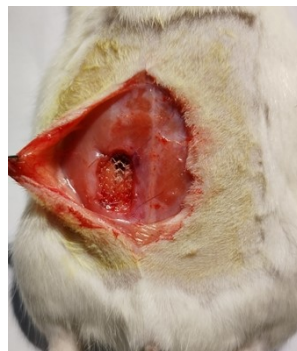

**Close  
abdomen**

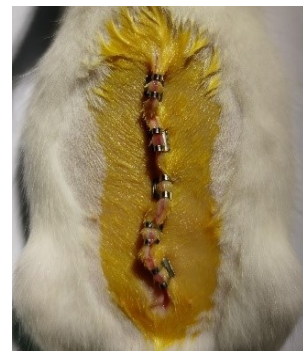

**Figure S2.** Hernia modeling and repair process.

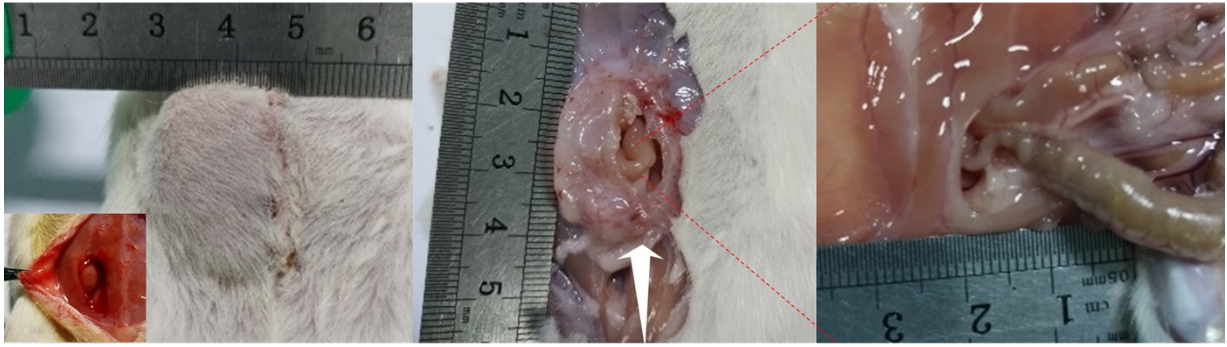

**Figure S3.** Photographs showing the hernia sac in the blank group.
